# Supplementary material for: Artificial Intelligence and Machine Learning in Cancer Research: A Systematic and Thematic Analysis of the Top 100 Cited Articles Indexed in Scopus Database
Source: PubMed Central journal article supplement — Cancer Control. 2022 Jun 10;29:10732748221095946. doi: 10.1177/10732748221095946 (PMC9189515; doi:10.1177/10732748221095946), 2022-06-10
Supplement: sj-pdf-1-ccx-10.1177_10732748221095946.pdf [file sj-pdf-1-ccx-10.1177_10732748221095946.pdf]

Table S1. Top 100 cited articles in Artificial Intelligence and Machine learning in cancer research

| SCR | Author                    | Title                                                                                                                                                   | PY   | DT      | TNC  |
|-----|---------------------------|---------------------------------------------------------------------------------------------------------------------------------------------------------|------|---------|------|
| 1   | Guyon I et al.            | Gene selection for cancer classification using support vector Machines                                                                                  | 2002 | Article | 5758 |
| 2   | Esteva A et al.           | Dermatologist-Level classification of skin cancer with Deep Neural Networks                                                                             | 2017 | Article | 3815 |
| 3   | Khan J et al.             | Classification and diagnostic prediction of cancers using Gene Expression Profiling and Artificial Neural Networks                                      | 2001 | Article | 2008 |
| 4   | Furey TS et al.           | Support vector machine classification and validation of cancer Tissue Samples Using microarray expression data                                          | 2000 | Article | 1809 |
| 5   | Kourou K et al.           | Machine learning applications in cancer prognosis and Prediction                                                                                        | 2015 | Review  | 960  |
| 6   | Bejnordi BE et al.        | Diagnostic assessment of deep learning algorithms for detection of lymph Node Metastases in women with breast cancer                                    | 2017 | Article | 791  |
| 7   | Sirinukunwattana K et al. | Locality sensitive deep learning for detection and classification of Nucleiin routine colon cancer Histology images                                     | 2016 | Article | 542  |
| 8   | Coudray N et al.          | Classification and mutation prediction from Nonsmall cell lung cancer histopathology Images using Deep Learning                                         | 2018 | Article | 539  |
| 9   | Cruz JA; Wishart DS       | Applications of machine learning in cancer prediction and prognosis                                                                                     | 2006 | Review  | 510  |
| 10  | Akay MF                   | Support vector Machines combined with feature selection for Breast Cancer Diagnosis                                                                     | 2009 | Article | 469  |
| 11  | Statnikov A et al.        | A comprehensive comparison of random forests and support vector machines for Microarray-based cancer classification                                     | 2008 | Article | 416  |
| 12  | Ardila D et al.           | End-to-End Lung cancer Screening with Three-Dimensional Deep Learning on low-Dose chest computed tomography                                             | 2019 | Article | 357  |
| 13  | Wu Y et al.               | Artificial Neural Networks in mammography: Application to decision Making in The diagnosis of breast cancer                                             | 1993 | Article | 351  |
| 14  | Araujo T., et al.         | Classification of breast cancer histology images using convolution Neural Networks                                                                      | 2017 | Article | 341  |
| 15  | Timmerman D et al.        | Logistic Regression Model to distinguish Between the benign and malignant Adnexal Mass Before surgery: A Multicenter study by the International Ovarian | 2005 | Article | 324  |
| 16  | Karabatak M; Ince MC      | An Expert system for detection of breast cancer Based on Association Rules and Neural Network                                                           | 2009 | Article | 320  |
| 17  | Lisboa PJ; Taktak AFG     | The use of Artificial Neural Networks in decision support In cancer: A Systematic Review                                                                | 2006 | Article | 314  |
| 18  | Xie B et al.              | Mircancer: A Micro RNAome-cancer Association database constructed by Text Mining on Literature                                                          | 2013 | Article | 297  |
| 19  | Zheng B et al.            | Breast cancer diagnosis based on feature extraction using a Hybrid of K-Means and support vector Machine Algorithms                                     | 2014 | Article | 296  |
| 20  | Abbass HA                 | An evolutionary Artificial Neural Networks approach for breast cancer diagnosis                                                                         | 2002 | Article | 294  |

|    |                          |                                                                                                                                                                                                        |      |         |     |
|----|--------------------------|--------------------------------------------------------------------------------------------------------------------------------------------------------------------------------------------------------|------|---------|-----|
| 21 | Wang Y et al.            | Gene selection from Microarray data for cancer classification -A Machine learning approach                                                                                                             | 2005 | Article | 286 |
| 22 | Langer DL et al.         | Prostate cancer detection with Multi-Parametric MRI: Logistic Regression analysis of Quantitative T2, Diffusion-Weighted imaging, and Dynamic contrast                                                 | 2009 | Article | 284 |
| 23 | Albarqouni S et al.      | Aggnet: Deep Learning from crowds for Mitosis detection in breast cancer histology images                                                                                                              | 2016 | Article | 271 |
| 24 | Tan AC and Gilbert D     | Ensemble machine learning on gene expression data for cancer classification.                                                                                                                           | 2003 | Article | 262 |
| 25 | Bi WL et al.             | Artificial Intelligence in cancer imaging: Clinical challenges and Applications                                                                                                                        | 2019 | Review  | 259 |
| 26 | Burke HB., et al.        | Artificial Neural Networks improve the accuracy of cancer survival Prediction                                                                                                                          | 1997 | Article | 259 |
| 27 | Gniadecka M et al.       | Melanoma Diagnosis by Raman spectroscopy and Neural Networks: Structure Alterations in Proteins and Lipids in Intact cancer tissue                                                                     | 2004 | Article | 256 |
| 28 | Zhou ZH et al.           | Lung Cancer Cell Identification Based on Artificial Neural Network Ensembles                                                                                                                           | 2002 | Article | 251 |
| 29 | Shen W et al.            | Multi-Crop convolutional Neural Networks for Lung Nodule Malignancy Suspiciousness classification                                                                                                      | 2017 | Article | 250 |
| 30 | Chen HL et al.           | A support vector Machine Classifier with Rough Set-Based feature Selection for breast cancer Diagnosis                                                                                                 | 2011 | Article | 245 |
| 31 | Polat K and Gne S        | Breast cancer Diagnosis using Least Square support vector machine                                                                                                                                      | 2007 | Article | 243 |
| 32 | Wei L et al.             | A study on several Machine-Learning methods for classification of Malignant and Benign clustered Micro calcifications                                                                                  | 2005 | Article | 243 |
| 33 | Lee Y; LEE CK            | Classification of multiple cancer types by Multicategory support vector Machines using Gene Expression data                                                                                            | 2003 | Article | 234 |
| 34 | Chaudhary K et al.       | Deep Learning based Multi-OMICS integration robustly predicts survival IN Liver cancer                                                                                                                 | 2018 | Article | 222 |
| 35 | Menden MP et al.         | Machine Learning prediction of cancer cell sensitivity to drugs Based on Genomic and Chemical properties                                                                                               | 2013 | Article | 221 |
| 36 | Dheeba J et al.          | Computer-Aided detection of breast cancer on Mammograms: A Swarm Intelligence Optimized wavelet Neural Network Approach                                                                                | 2014 | Article | 216 |
| 37 | Hirasawa T et al.        | Application of Artificial Intelligence using a convolution neural network for detecting Gastric cancer in Endoscopic images                                                                            | 2018 | Article | 204 |
| 38 | Rogers MA et al.         | Proteomic profiling of urinary proteins in renal cancer by surface enhanced laser desorption ionization and neural-network analysis: identification of key issues affecting potential clinical utility | 2003 | Article | 203 |
| 39 | Kuruvilla J; Gunavathi K | Lung cancer classification using neural networks for CT images.                                                                                                                                        | 2014 | Article | 202 |
| 40 | Acharya UR et al.        | Thermograph based breast cancer Detection using texture features and support vector machine                                                                                                            | 2012 | Article | 197 |
| 41 | Huang S et al.           | Applications of support vector Machine (SVM) Learning in cancer genomics.                                                                                                                              | 2018 | Review  | 195 |
| 42 | Zhang R; et al.          | Multicategory classification using an extreme learning machine for microarray Gene expression cancer diagnosis.                                                                                        | 2007 | Article | 195 |
| 43 | Jerez JM et al.          | Missing data imputation using statistical and machine learning methods in a real breast cancer problem                                                                                                 | 2010 | Article | 191 |

|    |                           |                                                                                                                                                         |      |         |     |
|----|---------------------------|---------------------------------------------------------------------------------------------------------------------------------------------------------|------|---------|-----|
| 44 | Parmar C et al.           | Radiomic machine-Learning classifiers for prognostic Biomarkers of head and Neck cancer                                                                 | 2015 | Article | 188 |
| 45 | Suzuki K et al.           | Computer-Aided Diagnostic Scheme for distinction between benign and malignant Nodules in thoracic Low-Dose CT by use of Massive Training Artificial Ne  | 2005 | Article | 187 |
| 46 | Bychkov D et al.          | Deep learning based tissue analysis predicts outcome in Colorectal cancer                                                                               | 2018 | Article | 186 |
| 47 | BAKER JA et al.           | Breast cancer: Prediction with artificial neural network Based on Bi-Rads standardized Lexicon                                                          | 1995 | Article | 185 |
| 48 | Han Z et al.              | Breast cancer Multi-Classification from Histopathological images with structured Deep Learning Model                                                    | 2017 | Article | 181 |
| 49 | Cawley GC; Talbot NLC     | Gene selection in cancer classification using Sparse Logistic Regression with Bayesian Regularization                                                   | 2006 | Article | 180 |
| 50 | Cruz-Roa A et al.         | Accurate and reproducible invasive breast cancer detection in whole-Slide Images: A Deep Learning Approach for Quantifying tumor Extent                 | 2017 | Article | 179 |
| 51 | Peng S et al.             | Molecular classification of cancer types from Microarray data using the combination of genetic Algorithms and support vector machines                   | 2003 | Article | 176 |
| 52 | Han SS et al.             | Classification of the Clinical Images for benign and malignant cutaneous Tumors using a Deep Learning Algorithm                                         | 2018 | Article | 175 |
| 53 | Kather JN et al.          | Deep learning can predict microsatellite Instability Directly from Histology in Gastrointestinal cancer                                                 | 2019 | Article | 174 |
| 54 | Wang H; Cruz-Roa A et al. | Mitosis detection in breast cancer pathology images by combining handcrafted and Convolutional Neural Network features                                  | 2014 | Article | 172 |
| 55 | Sftoiu A et al.           | Neural network analysis of dynamic sequences of EUS Elastography used for the differential Diagnosis of chronic pancreatitis and pancreatic cancer      | 2008 | Article | 169 |
| 56 | Chen DR et al.            | Diagnosis of breast tumors with sonographic texture Analysis using Wavelet Transform and Neural Networks                                                | 2002 | Article | 169 |
| 57 | Valentin L et al.         | Comparison of ‘‘Pattern ’recognition’ and logistic regression models for Discrimination between Benign and Malignant Pelvic Masses: A prospective cross | 2001 | Article | 160 |
| 58 | Jerez-Aragons JM et al.   | A combined neural network and decision trees Model for Prognosis of Breast cancer Relapse                                                               | 2003 | Article | 157 |
| 59 | Djavan B et al.           | Novel Artificial Neural Network for early Detection of Prostate cancer                                                                                  | 2002 | Article | 157 |
| 60 | Chougrad H et al.         | Deep convolutional Neural Networks for Breast cancer Screening                                                                                          | 2018 | Article | 150 |
| 61 | Chu F; Wang L             | Applications of Support vector Machines to cancer classification with Microarray data                                                                   | 2005 | Article | 150 |
| 62 | Chou SM et al.            | Mining the breast cancer pattern using Artificial Neural Networks and Multivariate Adaptive Regression Splines                                          | 2004 | article | 148 |
| 63 | Ciampi F et al.           | Towards Automatic Pulmonary Nodule Management in Lung cancer screening with Deep Learning                                                               | 2017 | Article | 146 |
| 64 | Hu Z et al.               | Deep Learning for Image-Based cancer Detection and Diagnosis survey                                                                                     | 2018 | Article | 145 |
| 65 | Bottaci L et al.          | Artificial Neural Networks applied to outcome Prediction for colorectal cancer Patients in Separate Institutions                                        | 1997 | Article | 144 |
| 66 | Xiao Y et al.             | A Deep Learning-Based Multi-Model Ensemble Method for cancer Prediction                                                                                 | 2018 | Article | 143 |

|    |                      |                                                                                                                                                        |      |         |     |
|----|----------------------|--------------------------------------------------------------------------------------------------------------------------------------------------------|------|---------|-----|
| 67 | Khan S et al.        | A Novel Deep Learning Based Framework for the Detection and classification of Breast Cancer using Transfer Learning                                    | 2019 | Article | 142 |
| 68 | Becker AS et al.     | Deep Learning in Mammography Diagnostic Accuracy of a Multipurpose Image Analysis Software In The Detection of Breast Cancer                           | 2017 | Article | 142 |
| 69 | Floyd J et al.       | Prediction of Breast cancer Malignancy Using an Artificial Neural Network                                                                              | 1994 | Article | 141 |
| 70 | Wang J et al.        | Discrimination of Breast Cancer with Microcal Cifications on Mammography by Deep Learning                                                              | 2016 | Article | 138 |
| 71 | Wolberg WH et al.    | Machine Learning Techniques to Diagnose Breast cancer from Image-Processed Nuclear Features of Fine Needle Aspirates                                   | 1994 | Article | 136 |
| 72 | Timmerman D et al.   | Ovarian Cancer Prediction in Adnexal Masses Using Ultrasound-Based Logistic Regression Models: A temporal and external validation study by the Iota Gr | 2010 | Article | 135 |
| 73 | Horie Y et al.       | Diagnostic outcomes of Esophageal cancer by Artificial Intelligence Using convolutional Neural Networks                                                | 2019 | Article | 134 |
| 74 | Ongenaert M et al.   | Pub meth: A Cancer Methylation Database Combining Text-Mining and Expert Annotation                                                                    | 2008 | Article | 131 |
| 75 | Shen L et al.        | Deep Learning to Improve Breast Cancer Detection on Screening Mammography                                                                              | 2019 | Article | 128 |
| 76 | Steiner DF et al.    | Impact of Deep Learning Assistance on the Histopathologic Review of Lymph Nodes for Metastatic Breast Cancer                                           | 2018 | Article | 128 |
| 77 | Wang H et al.        | A Support Vector Machine-Based Ensemble Algorithm for Breast Cancer Diagnosis                                                                          | 2018 | Article | 128 |
| 78 | Azar AT; EL-SAID SA  | Performance Analysis of Support vector Machines classifiers in Breast Cancer Mammography Recognition                                                   | 2014 | Article | 128 |
| 79 | Liu Y                | Active Learning with support vector machine applied to gene Expression data for cancer Classification                                                  | 2004 | Article | 126 |
| 80 | Chen Yd et al.       | Artificial neural networks analysis of surface-Enhanced Laser Desorption/Ionization Mass Spectra of serum Protein Pattern Distinguishes Colorectal Can | 2004 | Article | 125 |
| 81 | Nakamura K et al.    | Computerized analysis of The likelihood of Malignancy in solitary pulmonary nodules with Use of Artificial Neural Networks                             | 2000 | Article | 125 |
| 82 | YALA A et al.        | A Deep Learning Mammography-Based Model for Improved Breast cancer Risk Prediction                                                                     | 2019 | Article | 123 |
| 83 | Timmerman D et al.   | A Comparison of Methods for Preoperative Discrimination Between Malignant and Benign Adnexal Masses: The Development of a New Logistic Regression Mode | 1999 | Article | 122 |
| 84 | Liang M et al.       | Integrative Data Analysis of Multi-Platform cancer Data with A Multimodal Deep Learning Approach                                                       | 2015 | Article | 121 |
| 85 | Kather JN et al.     | Predicting survival from colorectal cancer histology slides using deep learning: a retrospective multicenter study                                     | 2019 | Article | 120 |
| 86 | BhardWAJ A; Tiwari A | Breast cancer diagnosis using genetically optimized Neural network model                                                                               | 2015 | Article | 120 |
| 87 | Ahmed FE             | Artificial neural networks for diagnosis and survival Prediction in colon cancer                                                                       | 2005 | review  | 120 |
| 88 | Hosny A et al.       | Deep learning for lung cancer prognostication: a retrospective multi-cohort radiomics study                                                            | 2018 | Article | 119 |

|     |                        |                                                                                                                                                 |      |         |     |
|-----|------------------------|-------------------------------------------------------------------------------------------------------------------------------------------------|------|---------|-----|
| 89  | Tailor A et al.        | Sonographic prediction of malignancy in adnexal Masses using multivariate logistic regression analysis                                          | 1997 | Article | 119 |
| 90  | Zhu F et al.           | Biomedical text mining and its applications in cancer research                                                                                  | 2013 | Review  | 118 |
| 91  | Marcano-Cedeo A et al. | WBCD breast cancer database classification applying artificial meta plasticity neural network                                                   | 2011 | Article | 118 |
| 92  | Stephan C et al.       | Multicenter evaluation of an artificial neural network to Increase the prostate cancer detection rate and reduce unnecessary biopsies           | 2002 | Article | 118 |
| 93  | Yokota T et al.        | lymph node metastasis as a significant prognostic factor in gastric cancer: a multiple logistic regression analysis                             | 2004 | Article | 117 |
| 94  | Xu Y et al.            | Artificial neural networks and gene filtering distinguish between global gene expression profiles of 'barrett's esophagus and esophageal cancer | 2002 | Article | 115 |
| 95  | Sun W et al.           | Enhancing deep convolutional neural network scheme for breast cancer diagnosis with unlabeled data                                              | 2017 | Article | 113 |
| 96  | Spasi I et al.         | Text mining of cancer-related information: review of Current status and future directions                                                       | 2014 | Review  | 113 |
| 97  | Chan HP et al.         | Computerized classification of malignant and benign micro calcifications on mammograms: texture analysis using an artificial neural network     | 1997 | Article | 112 |
| 98  | Huang CL et al.        | Prediction model building and feature selection with support vector machines in breast cancer diagnosis                                         | 2008 | Article | 110 |
| 99  | LustberG T et al.      | Clinical evaluation of atlas and deep learning based automatic contouring for lung cancer                                                       | 2018 | Article | 109 |
| 100 | Rodrguez-Ruiz A et al. | Detection of breast cancer with mammography: Effect of an artificial intelligence support system                                                | 2019 | Article | 108 |

SCR: Standard Competition Ranking; TNC: Total Number of Citation, DT: Documents Type; PY: Year of Publications

Table S 2. Performance measures for Artificial Intelligence and Machine learning in Cancer and the themes of each subperiod

| Subperiod | Theme/To | Clust | CC | CD | Theme indicators words an occurrences of top | Thematic Evolution |
|-----------|----------|-------|----|----|----------------------------------------------|--------------------|
|-----------|----------|-------|----|----|----------------------------------------------|--------------------|

| pic                         | er | (R)            | (R)             | 5 high frequency terms                                                                                                                                                                                                                                                                                                   | themes                   |
|-----------------------------|----|----------------|-----------------|--------------------------------------------------------------------------------------------------------------------------------------------------------------------------------------------------------------------------------------------------------------------------------------------------------------------------|--------------------------|
| <b>1993-2004</b>            |    |                |                 |                                                                                                                                                                                                                                                                                                                          |                          |
| Article                     | 1  | 175.0<br>1 (6) | 509.1<br>2 (1)  | Article (25), human (25), priority journal (25), artificial neural network (13), neural networks (13), diagnostic accuracy (11), breast cancer (8), breast neoplasms (7), and mammography (4).                                                                                                                           | Basic Theme              |
| Male                        | 4  | 58.73<br>(1)   | 613.1<br>8 (2)  | Male (7), Biological (4), colorectal cancer (3), tumor markers (3), mass spectrometry (2), Proteomics (2), colorectal neoplasms (2), computer program (2), learning systems (2), Protein (2), protein array analysis (2), protein determination (2), surface enhanced laser desorption ionization mass spectrometry (2). | Emerging Theme           |
| Humans                      | 5  | 105.3<br>4 (3) | 651.2<br>6 (3)  | Humans (17), controlled study (10) , Prediction (6), Adenocarcinoma (3), human cell (4), gene expression (3), validation process (3), Cultured (2), lung neoplasms (2), squamous cell (2).                                                                                                                               | Emerging Theme           |
| Diagnosis                   | 3  | 104.6<br>3 (2) | 697.1<br>4 (4)  | Diagnosis (7), Tumors (6), differential (4), neural networks(4), accuracy (3), forecasting (3), forecasting (2), cancer screening (2), and computer aided diagnosis (2).                                                                                                                                                 | Niche Theme              |
| Sensitivity and Specificity | 6  | 139.9<br>2 (4) | 1022.<br>72 (5) | sensitivity and specificity (10),Algorithms (7), Algorithm (6),cancer classification (6),Classification (6), Carcinoma (4),gene expression profiling (4), comparative study (4),dna microarray (4), artificial intelligence (3).                                                                                         | Motor Theme              |
| Female                      | 2  | 161.0<br>6 (5) | 1063.<br>36 (6) | Female (14), major clinical study (14), aged (8), adults (10), middle aged (7), prognosis (4), probability (4), p roc curve (5), 80 and over (4), predictive value of tests (4), and breast tumor (3).                                                                                                                   | Motor Theme              |
| <b>2005-2010</b>            |    |                |                 |                                                                                                                                                                                                                                                                                                                          |                          |
| Humans                      | 1  | 178.0<br>8 (3) | 1492.<br>30 (5) | humans (14),sensitivity and specificity (8), Diagnosis (8), priority journal (7), female (5), Adult (5), middle aged (5),Aged (4), prospective studies (4), logistic models (4), male (3).                                                                                                                               | Motor & Niche Theme      |
| Algorithms                  | 2  | 224.9<br>3 (5) | 1195.<br>85 (4) | Algorithms (10), Methodology (8), artificial intelligence (7), Algorithm (6), neural networks (6), support vector machines (6), gene expression profiling (5), Automated (5), automated pattern recognition (5), computer-assisted (5).                                                                                  | Motor Theme              |
| Human                       | 3  | 104.4<br>9 (2) | 1108.<br>83 (3) | Human (15), Article (15), Neoplasms (6),Neoplasm (4), Databases (3),gene expression regulation (2),Medline (2), DNA (2)Genetic (2),genetic database (2),Pubmed (2).                                                                                                                                                      | Emerging and Niche Theme |

|                       |   |                |                 |                                                                                                                                                                                                                                                                                          |                                |
|-----------------------|---|----------------|-----------------|------------------------------------------------------------------------------------------------------------------------------------------------------------------------------------------------------------------------------------------------------------------------------------------|--------------------------------|
|                       | 4 |                |                 | Cancer classification (5), artificial neural network (5), Prognosis (4), Biological neural networks (computer) (4), tumor markers (4), Bioinformatics (3), breast cancer (3), controlled study (3), Machine (3).                                                                         | Basic Theme                    |
| Cancer Classification |   | 210.5<br>1 (4) | 890.8<br>4 (2)  |                                                                                                                                                                                                                                                                                          |                                |
| <b>2011-2017</b>      |   |                |                 |                                                                                                                                                                                                                                                                                          |                                |
|                       | 1 |                |                 | Human (22), Humans (19), Article (14), Female (11), sensitivity and specificity (10), breast cancer (10), breast neoplasms (10), Pathology (9), breast tumor (9), computer-assisted (8).                                                                                                 | Basic Theme                    |
| Human                 |   | 173.7<br>1 (6) | 645.5<br>4 (2)  |                                                                                                                                                                                                                                                                                          |                                |
|                       | 2 |                |                 | Diseases (12), Diagnosis (6), breast cancer diagnosis (5), classification accuracy (4), feature extraction (3), support vector machines (3), classification (of information) (2), confusion matrices (2), machine learning techniques (2), receiver operating characteristic curves (2). | Emerging Theme                 |
| Diseases              |   | 40.32<br>(2)   | 592.7<br>2 (1)  |                                                                                                                                                                                                                                                                                          |                                |
|                       | 3 |                |                 | Machine learning (10),artificial neural network (10), neural networks (computer) (8), convolutional neural network (7), neural networks (7),deep learning (6),computer assisted diagnosis (5),Histopathology (4), image interpretation (4), Convolution (3).                             | Basic & Motor Theme            |
| Machine learning      |   | 119.9<br>2 (5) | 979.6<br>3 (4)  |                                                                                                                                                                                                                                                                                          |                                |
|                       | 4 |                |                 | Procedures (10), artificial intelligence (8), neoplasms (5), algorithms (5), learning systems (5), Neoplasm (4), Biology (3), Cancer (3), cancer research (3), Genetics (3), information processing (3).                                                                                 | Motor Theme                    |
| Procedures            |   | 92.28<br>(4)   | 1361.<br>04 (5) |                                                                                                                                                                                                                                                                                          |                                |
|                       | 5 |                |                 | Cancer classification (8), automation (2), classification (3), comparative study (3), learning algorithm (3), reproducibility (2), reproducibility of results (2).                                                                                                                       | Niche Theme                    |
| Cancer classification |   | 82.01<br>(3)   | 1619.<br>39 (6) |                                                                                                                                                                                                                                                                                          |                                |
|                       | 6 |                |                 | Accuracy (2), biological organs(2), computerized tomography(2),lung neoplasms(2),lung nodule(2), models(2),theoretical(2),tomography(2),x-ray computed(2).                                                                                                                               | Emerging Theme                 |
| Accuracy              |   | 37.18<br>(1)   | 826.1<br>9 (3)  |                                                                                                                                                                                                                                                                                          |                                |
| <b>2018-2019</b>      |   |                |                 |                                                                                                                                                                                                                                                                                          |                                |
|                       | 1 |                |                 | Article (13), computer-assisted (12), Pathology (12), Female (11), priority journal (11), retrospective study (8), Aged (7), middle aged (7), Male (6) , Adult (6), 80 and over (6).                                                                                                     | Motor Theme                    |
| Article               |   | 216.7<br>4 (5) | 1151.<br>98 (5) |                                                                                                                                                                                                                                                                                          |                                |
|                       | 2 |                |                 | Human (19), Humans (19), Algorithm (5), Genetics (5), Prediction (5), Algorithms (4), cancer classification (4), Neoplasm (3), cancer risk (3), Neoplasms (3).                                                                                                                           | Develoment & Prevalence degree |
| Human                 |   | 196.0<br>2 (3) | 1066.<br>10 (3) |                                                                                                                                                                                                                                                                                          |                                |
|                       | 3 |                |                 | Artificial neural network (8), Prognosis (3), retrospective studies (6), gene expression (3), Hematoxylin (2), cohort analysis (3), Histopathology (3), Mortality (3), validation study (3), clinical trial (2).                                                                         | Emerging Theme                 |
| Procedures            |   | 177.5<br>7 (1) | 1025.<br>16 (2) |                                                                                                                                                                                                                                                                                          |                                |

|                  |   |                |                 |                                                                                                                                                                                                                               |             |
|------------------|---|----------------|-----------------|-------------------------------------------------------------------------------------------------------------------------------------------------------------------------------------------------------------------------------|-------------|
| Machine learning | 4 | 178.8<br>0 (2) | 1113.<br>96 (4) | Machine learning (6), non small cell lung cancer (3), Carcinoma (4), cancer staging (4), risk assessment (3), lung neoplasms (3), lung tumor (3), non-small-cell lung (3), Tomography (3), x-ray computed (3).                | Niche Theme |
| Deep learning    | 5 | 196.1<br>5 (4) | 983.1<br>6 (1)  | Deep learning (16), diagnostic imaging (10), Mammography (5), computer assisted diagnosis (9), Diagnosis (8), breast cancer (5), breast tumor (6), neural networks (computer) (6), Reproducibility (6), breast neoplasms (5), | Basic Theme |

CC: CallonCentrality; CD: Callon Density ; R: Rank
